# Supplementary material for: Derivation and validation of a clinical severity score for acutely ill adults with suspected COVID-19: The PRIEST observational cohort study
Source: bioRxiv or medRxiv preprint supplement (doi:10.1101/2020.10.12.20209809), 2020-11-10
Supplement: Supplementary file [file media-1.pdf]

AFFIX PATIENT DETAILS LABEL HERE IF AVAILABLE

Name

Male

Female

Date of birth

--   

NHS Number

        

Hospital Number

        

DATE:

 - -   

TIME:

 : 

**PRESENTING FEATURES:**

- Shortness of breath     Confusion     Vomiting  
 Cough     Rash  
 Fever     Anosmia  
 Sore throat     Abdominal pain  
 Headache     Diarrhoea

**REFERRAL SOURCE**

- GP  
 Self  
 111  
 999  
 Other

**PREVIOUS**

- Flu Vaccine<sup>1</sup>     Oseltamivir<sup>2</sup>     Previous Attendance<sup>3</sup>

**ANTIBIOTIC THERAPY THIS ILLNESS?**

None

(Drug and duration)

**SYMPTOM DURATION**

(days)

**CURRENT MEDICATION**

None

**ALLERGIES TO MEDICATION**

None

**MEDICAL HISTORY / CHRONIC DISEASE**

None

- Heart disease     Diabetes     Hypertension  
 Renal impairment     Active malignancy (last 6 months)  
 Steroid therapy     Immunosuppression  
 Asthma     Other chronic lung disease

**RECENT TRAVEL HISTORY – last two weeks**

(Country, duration and days since return)

**LIFESTYLE**

- Patient lives alone / no fixed abode     Clinically obese     Pregnant

- Tobacco user     Vape user

- Known contact with Covid-19 case

*Relationship to contact*

**PAEDIATRIC ONLY**

- Routine vaccinations<sup>5</sup>     Taking feeds     Parental anxiety<sup>6</sup>     Premature<sup>4</sup>

**PERFORMANCE STATUS (tick one)**

- Unrestricted normal activity     Limited strenuous activity, can do light     Limited activity, can self care  
 Limited self care     Bed/chair bound, no self care

**PANDEMIC RESPIRATORY INFECTION FORM**

WITHDRAWN CASE?  Verbal  Leaflet

<sup>1</sup>Yes if any previous vaccine    <sup>2</sup>Yes if any use of oseltamivir in current illness  
<sup>3</sup>Yes if previous attendance at emergency dept. for this problem

<sup>4</sup>Premature defined as birth before 37 weeks gestation.

## CLINICAL EXAMINATION

**MOST LIKELY DIAGNOSIS?**

Influenza (Pandemic or seasonal)     Covid-19     Other (provide details)

Respiratory Rate

Severe respiratory distress<sup>1</sup>

Respiratory exhaustion

Severe dehydration

Pulse Rate

**OTHER CLINICAL CONCERNS:**

Temperature

Blood Pressure

SaO<sub>2</sub>

Post exercise SaO<sub>2</sub>  
(if measured)

FiO<sub>2</sub>

Central capillary refill

Normal    Abnormal



GCS Total

GCS individual scores not available

GCS-E

GCS-V

GCS-M

CXR

Not done

Normal

Abnormal

ECG

Not done

Normal

Abnormal

A

V

P

U

**BLOODS TAKEN**

Na

K

Urea

Creat

Hb

Plate

WCC

Lymp

Neut

Lac -  
tate

CRP

D-  
dimer

Trop  
- onin

## DISPOSITION AND CLINICAL PLAN

*Oseltamivir*

*Antibiotic*

*Antibiotic details*

Clinician Name:

Signature:

Grade:

Disposed to:

Date:

Time:

# PANDEMIC RESPIRATORY INFECTION FORM

<sup>1</sup>Severe respiratory distress (accessory muscles, tracheal tug, feeling of suffocation, apnoea)
