# Supplementary material for: Derivation and validation of a clinical severity score for acutely ill adults with suspected COVID-19: The PRIEST observational cohort study
Source: bioRxiv or medRxiv preprint supplement (doi:10.1101/2020.10.12.20209809), 2020-11-10
Supplement: Supplementary file [file media-2.pdf]

AFFIX PATIENT DETAILS LABEL HERE IF AVAILABLE

NHS Number

Hospital Number

DATE OF INITIAL VISIT: ::

30 DAYS DUE AT: ::

**Mortality status**

Alive  Dead

Date of death   
d d m m y y y y

**Respiratory pathogen confirmed**  Influenza (Pandemic or seasonal)

Covid-19  Other (provide details)

Date pathogen confirmed   
d d m m y y y y

**Was patient admitted at initial assessment**

Yes  No

Discharged home  Transferred to other hospital  Other / destination unknown

**Admissions up to 30 days:** using patient's notes please complete as fully as possible, indicating dates for events and what support provided. Please include initial assessment if patient was admitted.

| Reason for admission                                                                          | Ward                                                                                          | Admission dates | Respiratory support                                                                                                                                                                                       |      | Cardiovascular support |      | Renal support |      |  |
|-----------------------------------------------------------------------------------------------|-----------------------------------------------------------------------------------------------|-----------------|-----------------------------------------------------------------------------------------------------------------------------------------------------------------------------------------------------------|------|------------------------|------|---------------|------|--|
|                                                                                               |                                                                                               |                 | Days                                                                                                                                                                                                      | Type | Days                   | Type | Days          | Type |  |
| <input type="checkbox"/> Ward<br><input type="checkbox"/> ITU<br><input type="checkbox"/> HDU | <input type="checkbox"/> Ward<br><input type="checkbox"/> ITU<br><input type="checkbox"/> HDU | Start           | <input type="text"/> <input type="text"/><br><small>d d m m y y y y</small> |      |                        |      |               |      |  |
|                                                                                               |                                                                                               | End             | <input type="text"/> <input type="text"/><br><small>d d m m y y y y</small> |      |                        |      |               |      |  |
| <input type="checkbox"/> Ward<br><input type="checkbox"/> ITU<br><input type="checkbox"/> HDU | <input type="checkbox"/> Ward<br><input type="checkbox"/> ITU<br><input type="checkbox"/> HDU | Start           | <input type="text"/> <input type="text"/><br><small>d d m m y y y y</small> |      |                        |      |               |      |  |
|                                                                                               |                                                                                               | End             | <input type="text"/> <input type="text"/><br><small>d d m m y y y y</small> |      |                        |      |               |      |  |
| <input type="checkbox"/> Ward<br><input type="checkbox"/> ITU<br><input type="checkbox"/> HDU | <input type="checkbox"/> Ward<br><input type="checkbox"/> ITU<br><input type="checkbox"/> HDU | Start           | <input type="text"/> <input type="text"/><br><small>d d m m y y y y</small> |      |                        |      |               |      |  |
|                                                                                               |                                                                                               | End             | <input type="text"/> <input type="text"/><br><small>d d m m y y y y</small> |      |                        |      |               |      |  |

**30 day follow-up – for researcher use only**

AFFIX PATIENT DETAILS LABEL HERE IF AVAILABLE

NHS Number

Hospital Number

Was a DNR decision made at any time between initial presentation and follow-up  Yes  No

Date

d d m m y y y y

**If patient experienced any events that did not require respiratory, cardiovascular or renal support, but that:**

- were life threatening,
- resulted in persistent or significant disability or incapacity
- prolonged hospitalisation

Please add details below

**Adverse events:** using patient's notes please complete as fully as possible, indicating dates for events and what support provided

| Event details | Event dates                                                                                                                                                                                                                                                                                                                                                                                                                                                          | Seriousness                                                                                                                                                                   |
|---------------|----------------------------------------------------------------------------------------------------------------------------------------------------------------------------------------------------------------------------------------------------------------------------------------------------------------------------------------------------------------------------------------------------------------------------------------------------------------------|-------------------------------------------------------------------------------------------------------------------------------------------------------------------------------|
|               | Start <input type="text"/> <input type="text"/><br><small>d d m m y y y y</small><br>End <input type="text"/> OR <input type="checkbox"/> Ongoing<br><small>d d m m y y y y</small> | <input type="checkbox"/> Life threatening<br><input type="checkbox"/> Persistent or significant disability or incapacity<br><input type="checkbox"/> Prolongs hospitalisation |
|               | Start <input type="text"/> <input type="text"/><br><small>d d m m y y y y</small><br>End <input type="text"/> OR <input type="checkbox"/> Ongoing<br><small>d d m m y y y y</small> | <input type="checkbox"/> Life threatening<br><input type="checkbox"/> Persistent or significant disability or incapacity<br><input type="checkbox"/> Prolongs hospitalisation |
|               | Start <input type="text"/> <input type="text"/><br><small>d d m m y y y y</small><br>End <input type="text"/> OR <input type="checkbox"/> Ongoing<br><small>d d m m y y y y</small> | <input type="checkbox"/> Life threatening<br><input type="checkbox"/> Persistent or significant disability or incapacity<br><input type="checkbox"/> Prolongs hospitalisation |

**30 day follow-up – for researcher use only**
